# Supplementary material
Source: Springer Nature journal article supplement (https://www.springermedizin.de/resource/supplementary/12879_2005_326_MOESM6_ESM.pdf/9448786)

# Amplification Curves

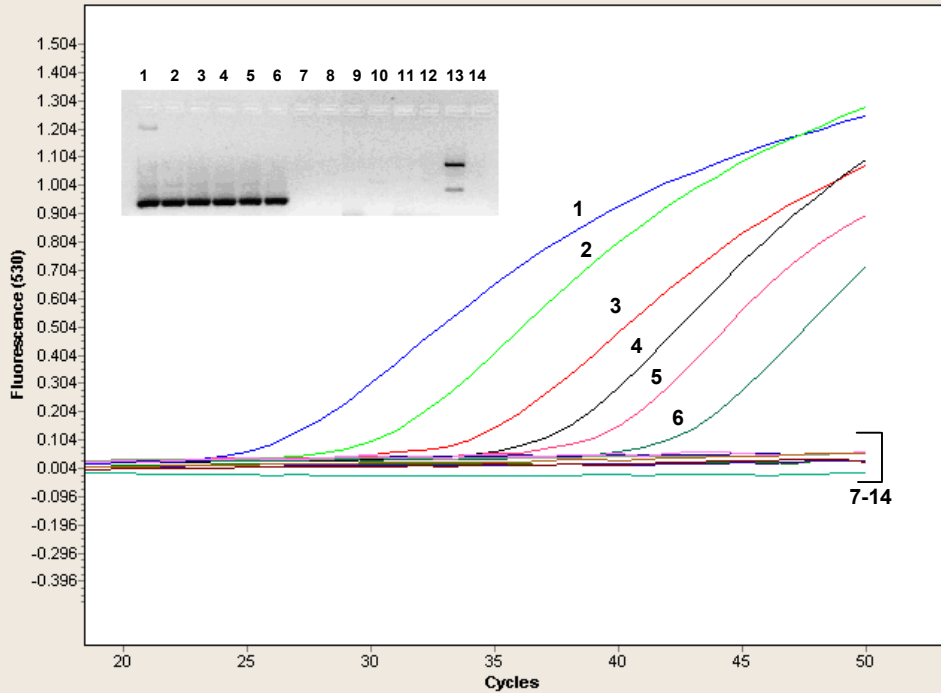

Supplement: MOESM6 [file 9448786]
